# Supplementary material
Source: MDPI journal article supplement (https://www.mdpi.com/2076-3417/14/5/1965)
Supplement: s1 [file s1]

Table S1. Incidence of resistant *E. coli* isolates for each antimicrobial compound according to sampling zone[illegible]

|           |      |      |      |      |     |     |    |     |   |   |     |     |      |     |
|-----------|------|------|------|------|-----|-----|----|-----|---|---|-----|-----|------|-----|
| A 4       | S    | S    | S    | S    | S   | S   | S  | S   | S | S | S   | S   | S    | S   |
| A 7       | S    | S    | S    | R    | S   | S   | S  | S   | S | S | S   | S   | S    | S   |
| A 8       | S    | S    | S    | R    | S   | S   | S  | S   | S | S | S   | S   | R    | S   |
| A 9       | S    | S    | S    | S    | S   | S   | S  | S   | S | S | S   | S   | S    | S   |
| A 12      | S    | S    | S    | S    | S   | S   | S  | S   | S | S | S   | S   | R    | S   |
| A 14      | R    | S    | S    | S    | S   | S   | S  | S   | S | S | S   | S   | S    | S   |
| A 15      | S    | S    | R    | S    | S   | R   | R  | S   | S | S | S   | S   | S    | S   |
| A 16      | S    | S    | S    | S    | S   | S   | S  | S   | S | S | S   | S   | S    | S   |
| A 17      | S    | S    | S    | S    | S   | S   | S  | S   | S | S | S   | S   | S    | S   |
| A 18      | S    | S    | R    | S    | S   | S   | S  | S   | S | S | S   | S   | S    | S   |
| A 19      | R    | R    | S    | R    | S   | S   | S  | S   | S | S | S   | S   | R    | S   |
| A 20      | S    | S    | S    | R    | S   | S   | S  | S   | S | S | S   | S   | S    | S   |
| A 21      | R    | R    | S    | S    | S   | S   | S  | S   | S | S | S   | S   | R    | S   |
| A 23      | S    | S    | R    | S    | S   | S   | S  | S   | S | S | S   | S   | S    | S   |
| A 24      | S    | S    | S    | S    | S   | S   | S  | S   | S | S | S   | S   | S    | S   |
| A 25      | S    | S    | R    | S    | S   | S   | S  | S   | S | S | S   | S   | S    | S   |
| A 26      | S    | S    | S    | S    | S   | S   | S  | S   | S | S | S   | S   | S    | S   |
| TOTAL (%) | 15.8 | 15.8 | 17.5 | 10.4 | 1.8 | 8.8 | 14 | 3.5 | 0 | 0 | 8.8 | 1.8 | 35.1 | 1.8 |

SMX: sulfamethoxazole; TMP: trimethoprim; CIP: ciprofloxacin; TET: tetracycline; MER: meropenem; AZI: Azithromycin; NAL: nalidixic acid; FOT: cefotaxime; CHL: chloramphenicol; TGC: tigecycline; TAZ: ceftazidime; COL: colistin; AMP: ampicillin; GEN: gentamicin. R: resistant; S: susceptible.

Table S2. Presence of antibiotic resistance genes in *E. coli* isolates according to sampling zone.

| <i>E. coli</i><br>isolates | ARGs           |              |              |              |              |
|----------------------------|----------------|--------------|--------------|--------------|--------------|
|                            | <i>bla</i> TEM | <i>qnr</i> S | <i>erm</i> B | <i>sul</i> I | <i>tet</i> W |
| VN1                        | +              | +            | -            | +            | -            |
| VN3                        | +              | +            | -            | +            | +            |
| VN4                        | -              | -            | -            | -            | +            |
| VN5                        | +              | -            | -            | +            | -            |
| VN6                        | +              | -            | -            | +            | -            |
| VN7                        | +              | -            | -            | +            | -            |
| VN8                        | +              | -            | -            | +            | -            |
| VN10                       | +              | +            | -            | +            | -            |
| VN11                       | +              | +            | -            | +            | -            |
| VN12                       | +              | -            | -            | +            | -            |
| VN13                       | +              | -            | -            | +            | -            |
| VN14                       | +              | -            | -            | +            | -            |
| VN15                       | +              | -            | -            | +            | -            |
| VN21                       | +              | -            | -            | +            | -            |
| VS 1                       | +              | +            | -            | +            | +            |
| VS 2                       | +              | +            | -            | +            | -            |
| VS 3                       | +              | +            | -            | +            | +            |
| VS 4                       | +              | -            | -            | +            | -            |
| VS 5                       | +              | -            | -            | +            | -            |
| VS 6                       | +              | -            | -            | +            | -            |
| VS 7                       | +              | -            | -            | +            | -            |
| VS 8                       | +              | -            | -            | +            | -            |
| VS 14                      | +              | -            | -            | -            | -            |
| VS 16                      | +              | -            | -            | -            | -            |
| VS 17                      | -              | +            | -            | +            | -            |
| VS 18                      | +              | -            | -            | +            | -            |
| VS 19                      | +              | +            | -            | +            | +            |
| VS 20                      | +              | +            | -            | +            | +            |
| VS 21                      | +              | -            | -            | +            | +            |
| VS 22                      | +              | +            | -            | +            | +            |
| VS 23                      | +              | +            | -            | +            | +            |
| VS 24                      | -              | +            | -            | +            | -            |
| VS 25                      | +              | -            | -            | +            | +            |
| VS 26                      | +              | -            | -            | +            | -            |
| VS 27                      | +              | +            | +            | +            | +            |
| VS 28                      | +              | +            | -            | +            | +            |
| VS 30                      | +              | -            | -            | +            | +            |
| A 1                        | +              | -            | -            | +            | -            |
| A 2                        | +              | -            | -            | +            | -            |

|           |           |           |         |           |           |
|-----------|-----------|-----------|---------|-----------|-----------|
| A 3       | +         | -         | -       | +         | +         |
| A 4       | +         | +         | -       | +         | +         |
| A 7       | +         | -         | -       | +         | +         |
| A 8       | +         | -         | -       | +         | +         |
| A 9       | +         | -         | -       | +         | -         |
| A 12      | +         | -         | -       | +         | +         |
| A 14      | +         | +         | -       | +         | -         |
| A 15      | +         | +         | -       | +         | -         |
| A 16      | +         | -         | -       | +         | -         |
| A 17      | +         | +         | -       | +         | +         |
| A 18      | +         | -         | -       | +         | -         |
| A 19      | +         | +         | -       | +         | +         |
| A 20      | -         | +         | -       | -         | -         |
| A 21      | +         | -         | -       | +         | -         |
| A 23      | +         | -         | -       | +         | +         |
| A 24      | +         | -         | -       | +         | -         |
| A 25      | +         | -         | -       | +         | +         |
| A 26      | +         | -         | -       | +         | -         |
| TOTAL (%) | 53 (92.9) | 21 (36.8) | 3 (5.2) | 53 (92.9) | 23 (45.1) |

+: gene detected  
 -: genes not detected

Table S3. Presence of antibiotic resistance genes in water samples according to sampling zone.

| Seawater samples | ARGs           |              |              |              |              |
|------------------|----------------|--------------|--------------|--------------|--------------|
|                  | <i>bla</i> TEM | <i>qnr</i> S | <i>erm</i> B | <i>sul</i> I | <i>tet</i> W |
| VN1              | -              | -            | -            | -            | -            |
| VN2              | +              | -            | -            | +            | -            |
| VN3              | -              | -            | -            | -            | -            |
| VN4              | +              | +            | -            | +            | +            |
| VN5              | -              | -            | -            | -            | +            |
| VN6              | +              | +            | -            | -            | -            |
| VN7              | -              | -            | -            | -            | -            |
| VN8              | -              | -            | -            | +            | +            |
| VN9              | -              | -            | -            | -            | -            |
| VN10             | +              | +            | -            | -            | -            |
| VN11             | -              | -            | -            | -            | -            |
| VN12             | -              | -            | -            | -            | -            |
| VN13             | +              | +            | -            | -            | +            |
| VN14             | +              | +            | -            | -            | +            |
| VN15             | -              | -            | -            | -            | -            |
| VN16             | -              | -            | -            | -            | -            |
| VN17             | -              | -            | -            | -            | -            |
| VN18             | -              | -            | -            | -            | -            |
| VN19             | -              | -            | -            | -            | -            |
| VN20             | -              | -            | -            | -            | -            |
| VN21             | -              | -            | -            | -            | -            |
| VS 1             | -              | -            | -            | -            | -            |
| VS 2             | +              | -            | -            | +            | -            |
| VS 3             | -              | -            | -            | -            | -            |
| VS 4             | -              | -            | -            | -            | -            |
| VS 5             | -              | -            | -            | -            | -            |
| VS 6             | +              | +            | -            | -            | -            |
| VS 7             | +              | +            | -            | +            | -            |
| VS 8             | +              | -            | -            | -            | -            |
| VS 9             | +              | -            | -            | -            | -            |
| VS 10            | +              | -            | -            | -            | -            |
| VS 11            | -              | -            | -            | -            | -            |
| VS 12            | -              | -            | -            | -            | -            |
| VS 13            | -              | -            | -            | -            | -            |
| VS 14            | -              | -            | -            | -            | -            |
| VS 15            | -              | -            | -            | -            | -            |
| VS 16            | +              | +            | -            | -            | -            |

|           |           |           |         |           |           |
|-----------|-----------|-----------|---------|-----------|-----------|
| VS 17     | +         | +         | -       | -         | -         |
| VS 18     | -         | -         | -       | -         | -         |
| VS 19     | +         | +         | -       | +         | -         |
| VS 20     | -         | -         | -       | -         | -         |
| VS 21     | +         | -         | -       | -         | -         |
| VS 22     | +         | -         | -       | +         | -         |
| VS 23     | -         | -         | -       | -         | -         |
| VS 24     | +         | +         | -       | -         | -         |
| VS 25     | +         | +         | -       | -         | -         |
| VS 26     | +         | +         | -       | +         | -         |
| VS 27     | -         | -         | -       | -         | -         |
| VS 28     | +         | +         | -       | -         | -         |
| VS 29     | -         | -         | -       | -         | -         |
| VS 30     | -         | -         | -       | -         | -         |
| A 1       | +         | -         | -       | +         | -         |
| A 2       | -         | -         | -       | -         | -         |
| A 3       | +         | -         | -       | -         | -         |
| A 4       | +         | -         | -       | -         | -         |
| A 5       | +         | -         | -       | +         | +         |
| A 6       | +         | -         | -       | +         | +         |
| A 7       | -         | -         | -       | +         | +         |
| A 8       | -         | -         | -       | -         | -         |
| A 9       | +         | +         | -       | -         | -         |
| A 10      | +         | +         | -       | -         | -         |
| A 11      | -         | -         | -       | -         | -         |
| A 12      | +         | +         | -       | -         | -         |
| A 13      | +         | -         | -       | -         | +         |
| A 14      | -         | -         | -       | +         | -         |
| A 15      | +         | +         | +       | +         | +         |
| A 16      | -         | -         | -       | -         | -         |
| A 17      | +         | +         | -       | +         | -         |
| A 18      | -         | +         | -       | +         | +         |
| A 19      | +         | -         | -       | -         | -         |
| A 20      | -         | +         | -       | -         | +         |
| A 21      | +         | -         | -       | +         | -         |
| A 22      | -         | -         | -       | -         | -         |
| A 23      | +         | +         | -       | -         | -         |
| A 24      | -         | +         | -       | -         | +         |
| A 25      | -         | +         | -       | +         | -         |
| A 26      | +         | +         | -       | -         | -         |
| TOTAL (%) | 36 (46.7) | 25 (32.5) | 1 (1.2) | 18 (23.4) | 13 (16.9) |

+: gene detected

-: genes not detected

Table S4. Incidence of resistant *Enterococcus* sp. isolates for each antimicrobial compound according to sampling zone.

| Enterococci isolates | Antimicrobial |     |     |          |     |     |     |          |     |          |     |     |
|----------------------|---------------|-----|-----|----------|-----|-----|-----|----------|-----|----------|-----|-----|
|                      | AMP           | CHL | CIP | DAP      | ERY | GEN | LIN | QUIN/DAL | TEI | TET      | TGC | VAN |
| VN2                  | S             | S   | S   | S        | S   | S   | S   | S        | S   | S        | S   | S   |
| VN3                  | S             | S   | S   | S        | S   | S   | S   | S        | S   | S        | S   | S   |
| VN4                  | S             | S   | S   | S        | S   | S   | S   | S        | S   | S        | S   | S   |
| VN5                  | S             | S   | S   | S        | S   | S   | S   | S        | S   | S        | S   | S   |
| VN6                  | S             | S   | S   | S        | S   | S   | S   | S        | S   | S        | S   | S   |
| VN8                  | S             | S   | S   | S        | S   | S   | S   | S        | S   | S        | S   | S   |
| VN8                  | S             | S   | S   | S        | S   | S   | S   | S        | S   | S        | S   | S   |
| VN10                 | S             | S   | S   | S        | S   | S   | S   | S        | S   | S        | S   | S   |
| VN10                 | S             | S   | S   | S        | S   | S   | S   | S        | S   | S        | S   | S   |
| VS6                  | S             | S   | S   | S        | S   | S   | S   | S        | S   | S        | S   | S   |
| VS7                  | S             | S   | S   | S        | S   | S   | S   | S        | S   | S        | S   | S   |
| VS8                  | S             | S   | S   | S        | S   | S   | S   | S        | S   | S        | S   | S   |
| VS10                 | S             | S   | S   | S        | S   | S   | S   | S        | S   | S        | S   | S   |
| VS16                 | S             | S   | S   | S        | S   | S   | S   | S        | S   | S        | S   | S   |
| VS17                 | S             | S   | S   | S        | S   | S   | S   | S        | S   | <b>R</b> | S   | S   |
| VS19                 | S             | S   | S   | S        | S   | S   | S   | S        | S   | <b>R</b> | S   | S   |
| VS21                 | S             | S   | S   | S        | S   | S   | S   | S        | S   | <b>R</b> | S   | S   |
| VS24                 | S             | S   | S   | S        | S   | S   | S   | S        | S   | <b>R</b> | S   | S   |
| VS25                 | S             | S   | S   | S        | S   | S   | S   | S        | S   | S        | S   | S   |
| VS26                 | S             | S   | S   | <b>R</b> | S   | S   | S   | S        | S   | S        | S   | S   |
| VS28                 | S             | S   | S   | S        | S   | S   | S   | S        | S   | S        | S   | S   |
| A1                   | S             | S   | S   | S        | S   | S   | S   | S        | S   | <b>R</b> | S   | S   |
| A3                   | S             | S   | S   | S        | S   | S   | S   | S        | S   | S        | S   | S   |
| A4                   | S             | S   | S   | S        | S   | S   | S   | S        | S   | S        | S   | S   |
| A9                   | S             | S   | S   | S        | S   | S   | S   | S        | S   | <b>R</b> | S   | S   |
| A15                  | S             | S   | S   | S        | S   | S   | S   | S        | S   | S        | S   | S   |
| A17                  | S             | S   | S   | S        | S   | S   | S   | S        | S   | S        | S   | S   |
| A18                  | S             | S   | S   | S        | S   | S   | S   | S        | S   | S        | S   | S   |
| A20                  | S             | S   | S   | S        | S   | S   | S   | S        | S   | S        | S   | S   |
| A26                  | S             | S   | S   | S        | S   | S   | S   | S        | S   | S        | S   | S   |
| TOTAL (%)            | 0             | 0   | 0   | 3.3      | 0   | 0   | 0   | 0        | 0   | 20       | 0   | 0   |

AMP: ampicillin; CHL: chloramphenicol; CIP: ciprofloxacin; DAP: daptomycin; SMX: sulfamethoxazole; ERY: erythromycin; GEN: gentamicin, LIN: Linezolid; QUIN/DAL: quinopristin/dalfopristin; TEI: teicoplanin; TET: tetracycline; TGC: tigecycline; VAN: vancomycin. R: resistant; S: susceptible

Table S5. Presence of antibiotic resistance genes in *Enterococcus* sp. isolates according to sampling zone.

| Enterococci | ARGs           |              |              |              |              |
|-------------|----------------|--------------|--------------|--------------|--------------|
|             | <i>bla</i> TEM | <i>qnr</i> S | <i>erm</i> B | <i>sul</i> I | <i>tet</i> W |
| VN2         | -              | -            | -            | -            | -            |
| VN3         | +              | -            | -            | -            | -            |
| VN4         | -              | -            | -            | -            | -            |
| VN5         | -              | -            | +            | -            | -            |
| VN6         | +              | -            | -            | -            | -            |
| VN8         | -              | +            | -            | -            | -            |
| VN8         | -              | -            | -            | -            | -            |
| VN10        | +              | -            | -            | -            | -            |
| VN10        | -              | -            | -            | -            | -            |
| VS6         | -              | -            | -            | -            | -            |
| VS7         | -              | -            | -            | -            | -            |
| VS8         | +              | -            | -            | -            | -            |
| VS10        | -              | -            | -            | -            | -            |
| VS16        | -              | -            | -            | -            | -            |
| VS17        | -              | -            | -            | -            | -            |
| VS19        | -              | -            | +            | -            | -            |
| VS21        | -              | -            | -            | -            | -            |
| VS24        | -              | -            | -            | -            | -            |
| VS25        | -              | -            | -            | -            | -            |
| VS26        | -              | -            | -            | -            | -            |
| VS28        | -              | -            | -            | -            | -            |
| A1          | +              | -            | -            | -            | -            |
| A3          | -              | -            | -            | -            | -            |
| A4          | +              | -            | -            | -            | -            |
| A9          | +              | -            | -            | -            | +            |
| A15         | +              | -            | -            | -            | -            |
| A17         | +              | -            | -            | -            | -            |
| A18         | +              | -            | -            | -            | -            |
| A20         | +              | -            | -            | -            | -            |
| A26         | +              | -            | -            | -            | -            |
| TOTAL (%)   | 40             | 3.3          | 6.6          | 0            | 3.3          |

+: gene detected

-: genes not detected
